# Supplementary material for: Hyaluronic-Acid-Tagged Cubosomes Deliver Cytotoxics Specifically to CD44-Positive Cancer Cells
Source: PubMed Central journal article supplement (PMC9727730; doi:10.1021/acs.molpharmaceut.2c00439), 2022-08-08
Supplement: mp2c00439_si_001.pdf [file mp2c00439_si_001.pdf]

## Supplementary Information

### **Hyaluronic acid-tagged cubosomes deliver cytotoxics specifically to CD44-positive cancer cells**

Arindam Pramanik<sup>1\*</sup>, Zexi Xu<sup>2</sup>, Nicola Ingram<sup>1</sup>, Patricia Louise Coletta<sup>1</sup>, Paul A Millner<sup>3</sup>, Arwen I.I. Tyler<sup>2\*</sup>, Thomas A Hughes<sup>1\*</sup>

<sup>1</sup>School of Medicine, University of Leeds, Leeds, United Kingdom

<sup>2</sup>School of Food Science and Nutrition, University of Leeds, Leeds, United Kingdom

<sup>3</sup>School of Biomedical Sciences, University of Leeds, United Kingdom

Corresponding authors email addresses: [a.pramanik@leeds.ac.uk](mailto:a.pramanik@leeds.ac.uk); [a.i.i.tyler@leeds.ac.uk](mailto:a.i.i.tyler@leeds.ac.uk); [t.hughes@leeds.ac.uk](mailto:t.hughes@leeds.ac.uk)

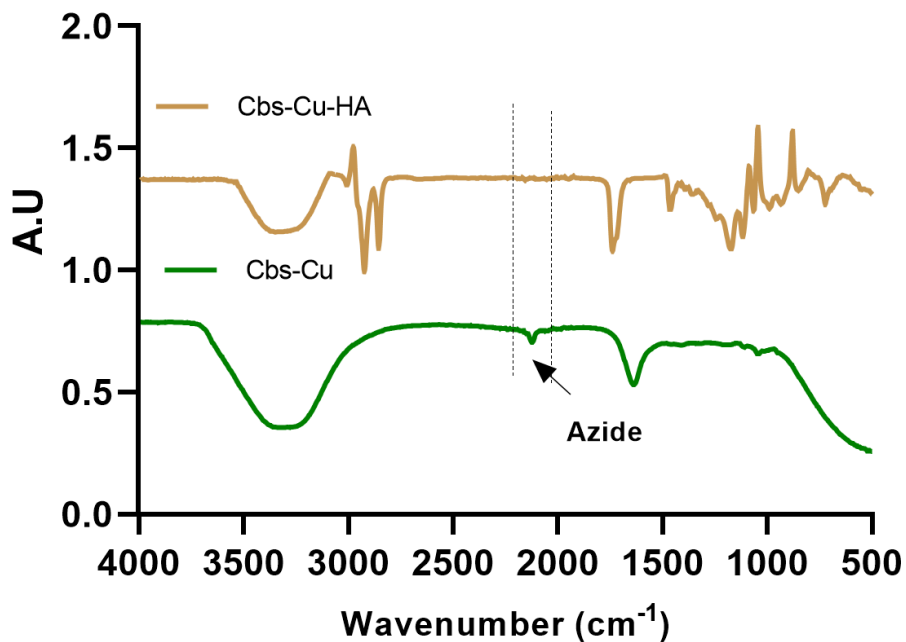

**Figure S1.** Fourier-transformed infrared spectra of HA tagged (Cbs-Cu-HA) and untagged (Cbs-Cu) cubosomes loaded with CuAc show that Cbs-Cu shows a peak at 2127 cm<sup>-1</sup> attributed to the azide (N=N=N) functional group. After conjugation of HA-DBCO to the DSPE-azide group on the cubosomes, the peak is absent in the spectrum for Cbs-Cu-HA which confirms the covalent linkage of HA to the cubosome surface.

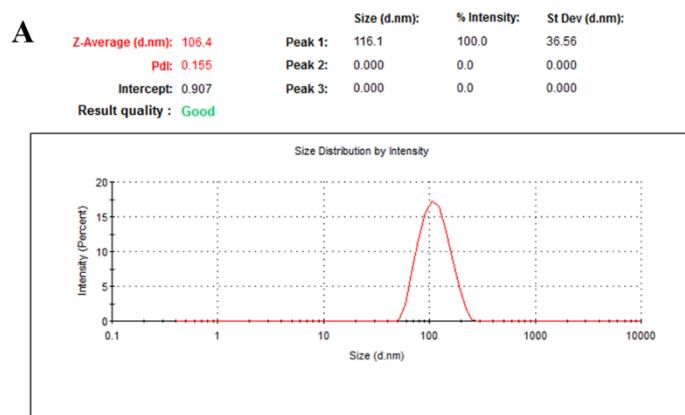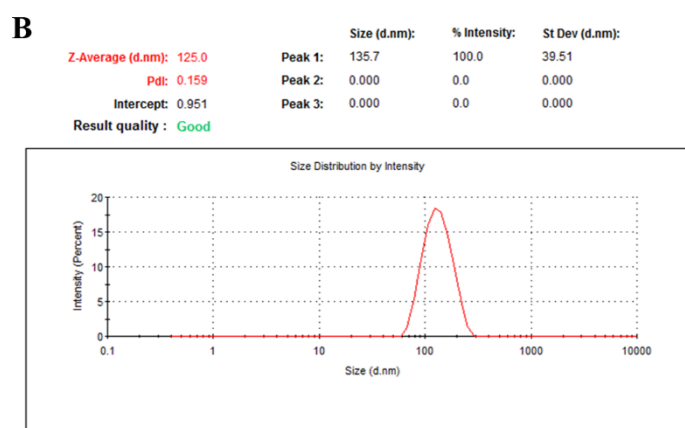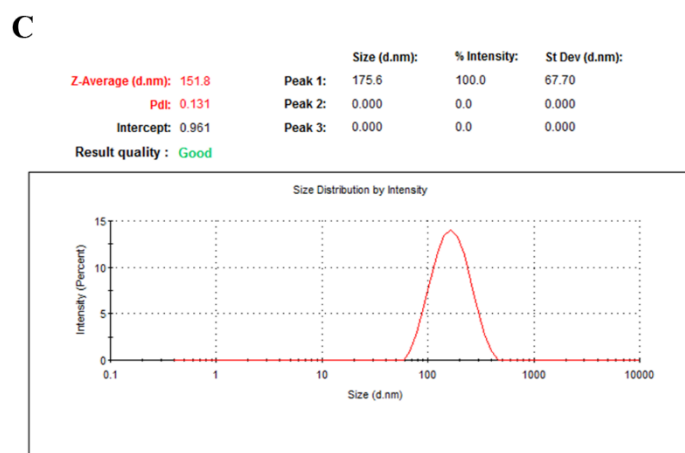

**Figure S2.** Dynamic light scattering data of bare cubosomes (A), CuAc-loaded cubosomes (B) and CuAc-loaded, HA-tagged cubosomes (C).

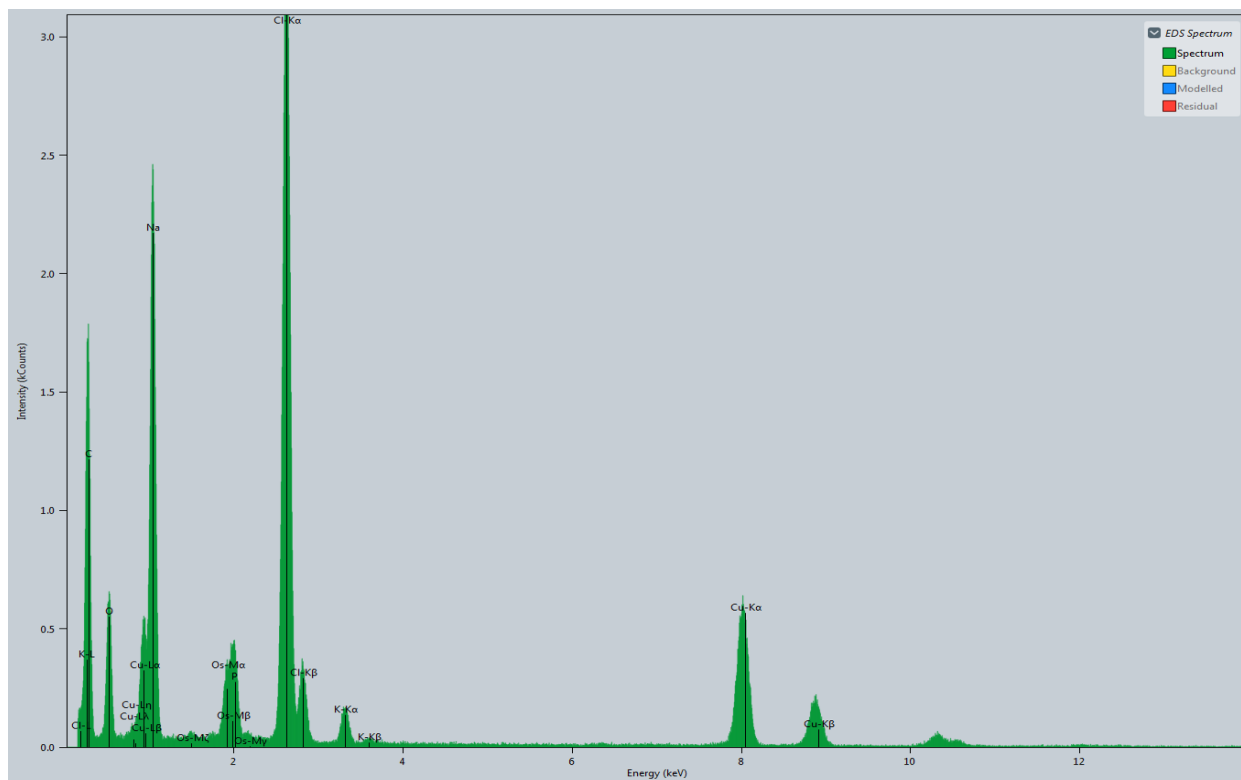

**Figure S3.** Energy Dispersive X-Ray (EDAX) spectrum of bare cubosomes (Cbs) showing very low intensity peaks for Copper compared to Cbs-Cu-HA.

|                                   | Mean (mV)            | Area (%) | St Dev (mV) |
|-----------------------------------|----------------------|----------|-------------|
| <b>Zeta Potential (mV): -40.8</b> | <b>Peak 1: -40.8</b> | 100.0    | 7.73        |
| Zeta Deviation (mV): 7.73         | Peak 2: 0.00         | 0.0      | 0.00        |
| Conductivity (mS/cm): 0.111       | Peak 3: 0.00         | 0.0      | 0.00        |

Result quality : **Good**

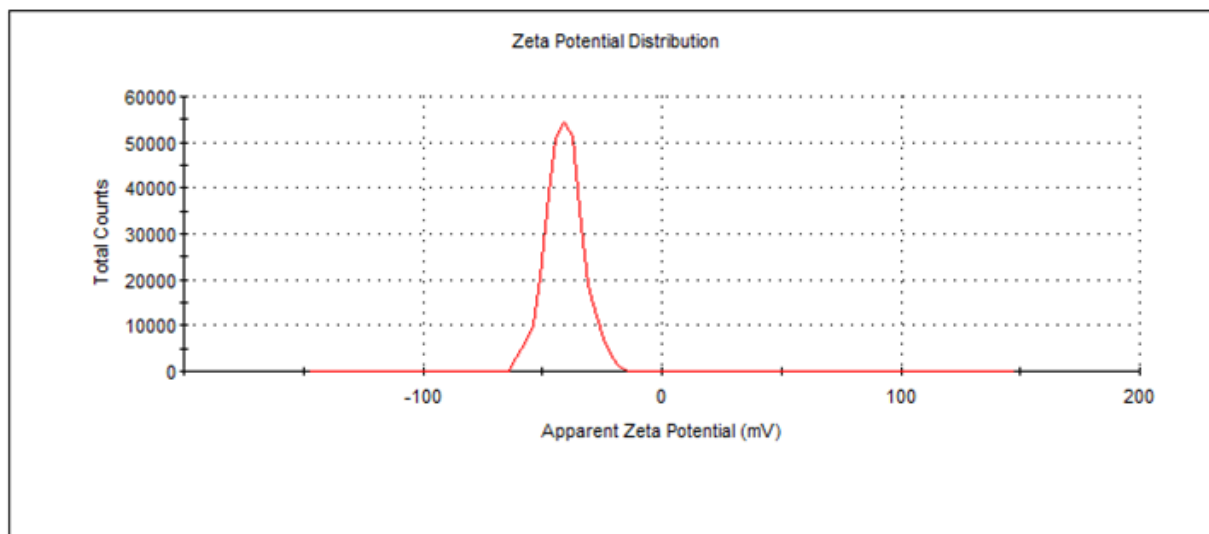

**Figure S4.** Zeta potential measurement. The surface charge of the Cbs-Cu-HA was found to be -40.8 mV which represents electrostatic stability of the nanoparticles.

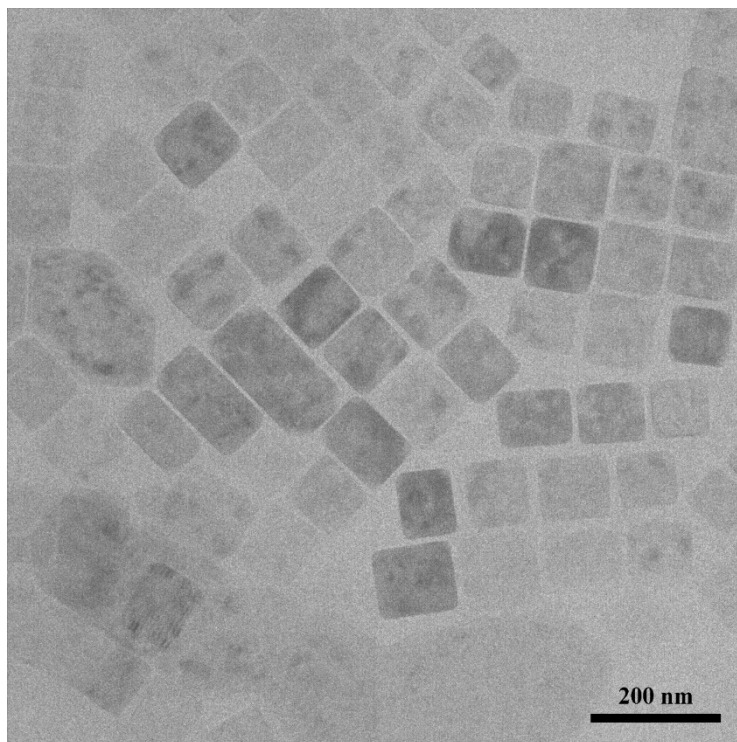

**Figure S5.** Transmission electron microscope (TEM) image for morphology and structure of the bare cubosome (Cbs).

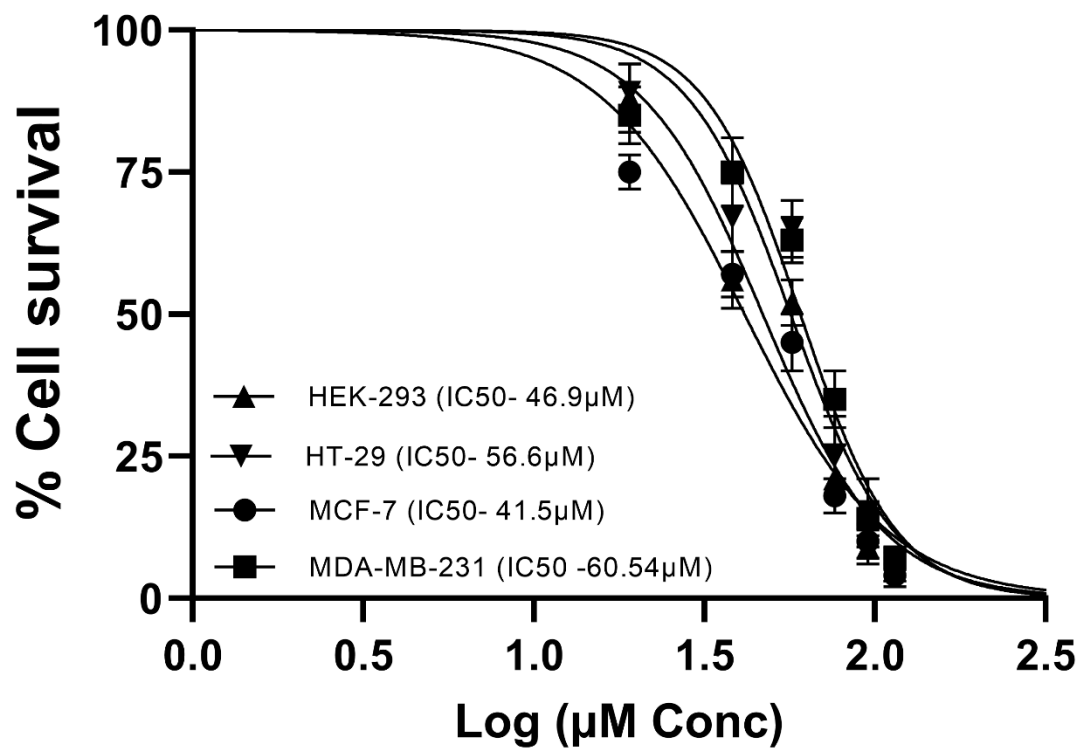

**Figure S6.** Cytotoxicity assay of CuAc on cells. MTT assay of unencapsulated CuAc showed dose dependent but non-selective cytotoxicity on all four cell lines with varying LD<sub>50</sub> values (calculated from non-linear regression curves). Data show that CuAc itself does not have selectivity towards any cells and only when delivered via Cbs-HA could shows selective toxicity in CD44 expressing cells.

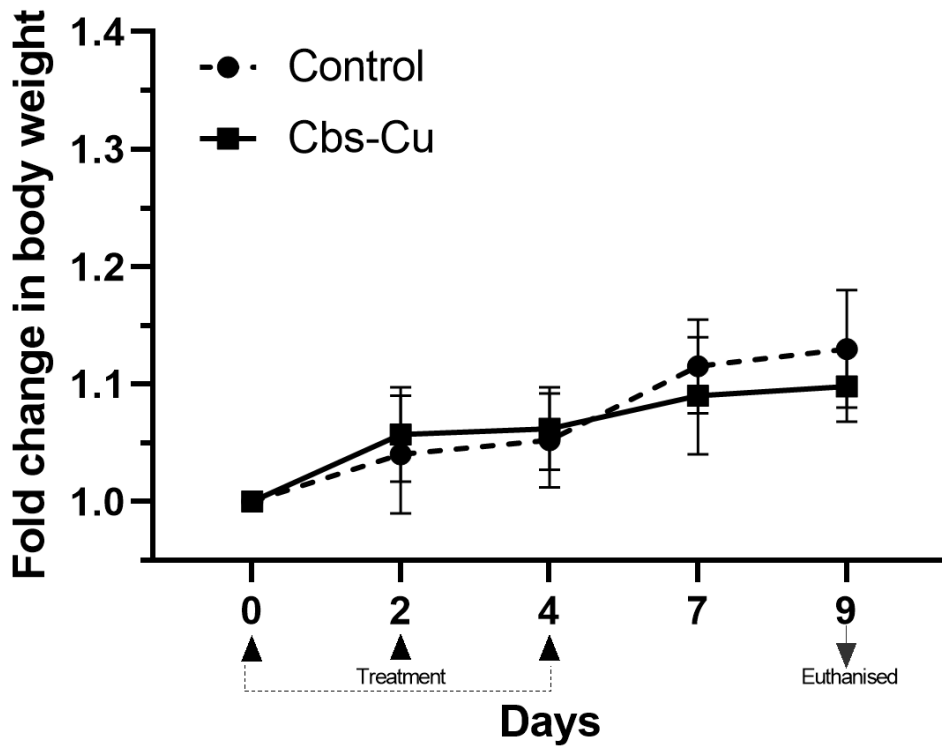

**Figure S7.** Fold change in mice body weight. The body weight of mice was noted for the two groups receiving either Cbs-Cu or saline (control) during the experiment conduct. There was no significant change or loss of body weight upon Cbs-Cu compared to control which indicates absence of toxicity.
